# Supplementary material
Source: ML conference proceedings conference paper supplement (https://openaccess.thecvf.com/content/CVPR2023/html/Zhou_Unsupervised_Cumulative_Domain_CVPR_2023_paper.html)
Supplement: Supplementary file 1 [file Zhou_Unsupervised_Cumulative_Domain_CVPR_2023_supplemental.zip]

Archive with 3 entries (2 files):
- ID1408_UCDA-Flow_Supplementary/ID1408_UCDA-Flow_Supplementary.pdf
- ID1408_UCDA-Flow_Supplementary/ID1408_UCDA-Flow_Video.zip
- ID1408_UCDA-Flow_Supplementary/
